# Supplementary material for: Two and three-dimensional halogen-bonded frameworks: self-assembly influenced by crystallization solvents
Source: Royal Society of Chemistry journal article supplement (doi:10.1039/d3cc02981f), 2023-01-01

**General methods.** All reagents were obtained from commercial suppliers and used without further purification unless otherwise noted.  $^1\text{H}$  and  $^{13}\text{C}$  NMR spectra were recorded with a 400 MHz or 100 MHz spectrometer in the indicated solvents at 25 °C. Chemical shifts are expressed in parts per million ( $\delta$ ) using residual proton resonances of the deuterated solvents as the internal standards. Crystals were measured using Bruker D8 Venture-Metaljet diffractometer equipped with an PHOTON II area detector and HELIOS multilayer optics monochromated Mo-K $\alpha$  radiation ( $\lambda = 0.71073 \text{ \AA}$ ). Crystal structures were solved by direct method and refined by full-matrix least-squares methods based on F2 using SHELXL-2014 software. X-ray diffraction (XRD) patterns were obtained on a Bruker D8 Advance diffractometer with a Cu K $\alpha$  radiation operated at 40 kV and 40 mA. Hirshfeld surfaces and fingerprint plots were calculated by CrystalExplorer-21.5 software. CCDC (Nos. 2261133, 2261139, 2261140) contains the related crystallographic data, which can be obtained free of charge from The Cambridge Crystallographic Data Centre via [www.ccdc.cam.ac.uk/data\\_request/cif](http://www.ccdc.cam.ac.uk/data_request/cif).

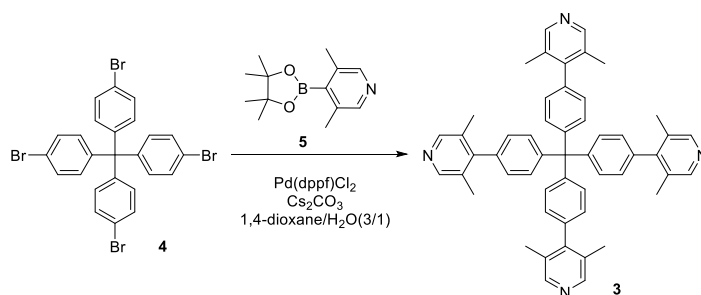

**Compound 3.** To a solution of compound **4** (365 mg, 0.57 mmol), compound **5** (670 mg, 2.87 mmol), Pd(dppf)Cl<sub>2</sub> (42 mg, 0.057 mmol) and Cs<sub>2</sub>CO<sub>3</sub> (819 mg, 1.72 mmol) in 1,4-dioxane/H<sub>2</sub>O (20 mL). The reaction mixture was stirred at 85°C for overnight under N<sub>2</sub>. The reaction was monitored by TLC. After reaction finished, the mixture was concentrated and purified by flash column chromatography on silica gel eluted with (DCM/MeOH=10/1) to give compound **3** (184 mg, 44 %) as an off-white solid.  $^1\text{H}$ NMR (400 MHz, CDCl<sub>3</sub>):  $\delta$  8.36 (s, 8H), 7.42 (d,  $J = 8.4 \text{ Hz}$ , 8H), 7.11 (d,  $J = 8.8 \text{ Hz}$ , 8H), 2.08 (s, 24H).  $^{13}\text{C}$  NMR (100 MHz, CDCl<sub>3</sub>)  $\delta$  (ppm): 148.85, 148.47, 145.73, 136.22, 131.39, 130.76, 127.56, 29.72, 17.34. HR-MS (ESI): Calcd for C<sub>53</sub>H<sub>49</sub>N<sub>4</sub> [M+H]<sup>+</sup>: 741.3957. Found: 741.3963.

**Co-crystal of 1·2.** Compound **2** (10.8 mg, 0.027 mmol) and Compound **1** (10 mg, 0.013 mmol) were dissolved in dichloromethane (5.0 mL), and then dimethyl sulfoxide (0.05 mL) was added to the mixture. The co-crystal suitable for X-ray diffraction of compound **1** and **2** was obtained by slowly evaporation crystallization of the mixed solvent.

**Co-crystal of solvate 1·2·CHCl<sub>3</sub>.** Compound **2** (10.8 mg, 0.027 mmol) and Compound **1** (10 mg, 0.013 mmol) were dissolved in chloroform (5.0 mL), and then dimethyl sulfoxide (0.05 mL) was added to the mixture. The co-crystal suitable for X-ray diffraction of compound **1**, **2** and CHCl<sub>3</sub> was obtained by slowly evaporation crystallization of the mixed solvent.

**Co-crystal of solvate 1·CHCl<sub>3</sub>.** Compound **1** (10 mg, 0.013 mmol) were dissolved in

chloroform (5.0 mL). The co-crystal suitable for X-ray diffraction of **solvate 1**·CHCl<sub>3</sub> was obtained by slowly evaporation crystallization of the mixed solvent.

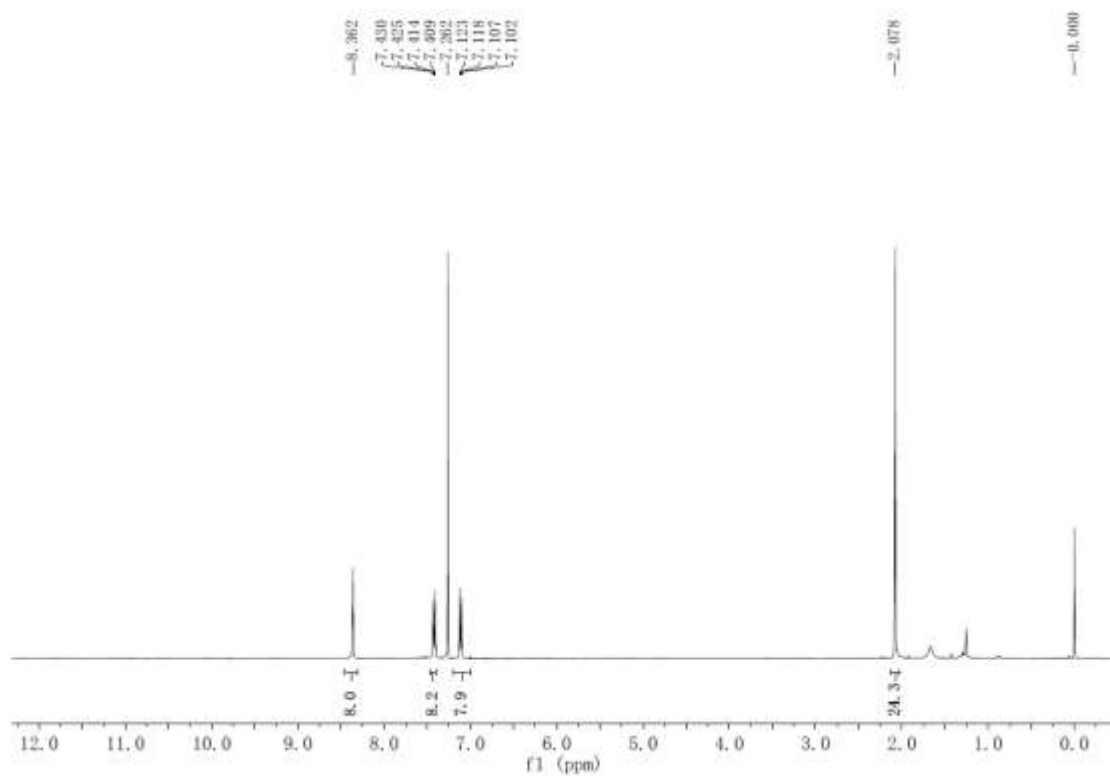

**Figure S1.** <sup>1</sup>H NMR (400 MHz, CDCl<sub>3</sub>) spectrum of compound **3** at 25 °C.

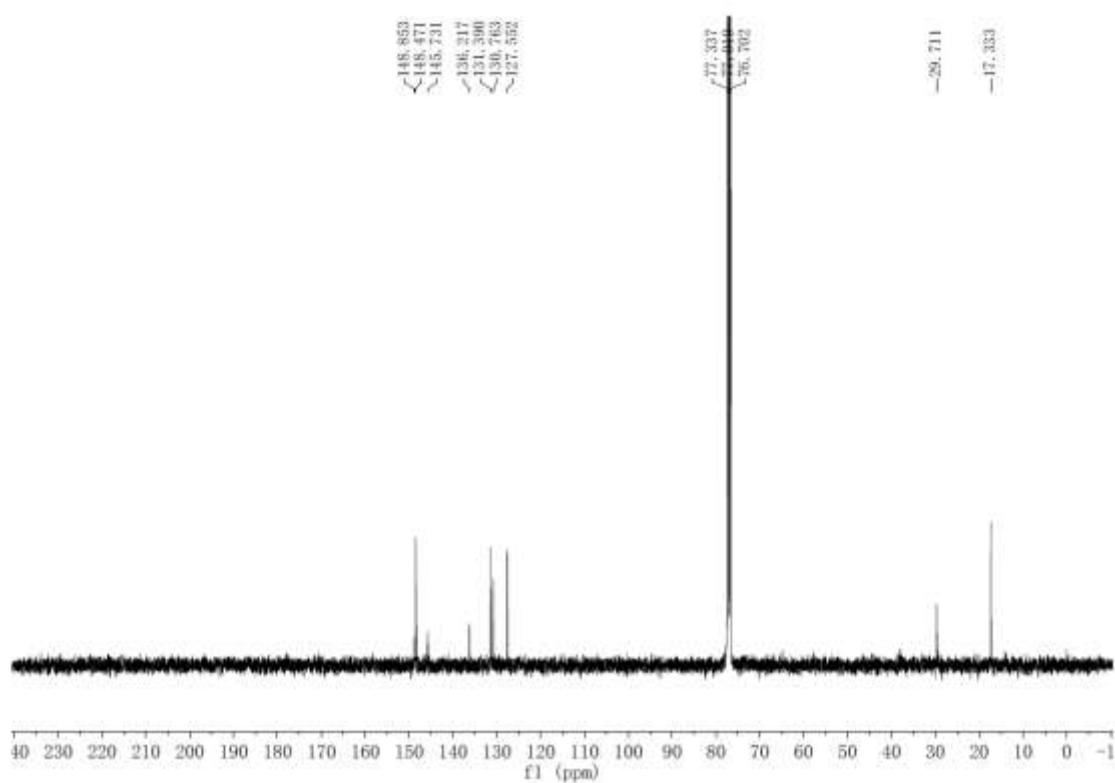

**Figure S2.** <sup>13</sup>C NMR (100 MHz, CDCl<sub>3</sub>) spectrum of compound **3** at 25 °C.

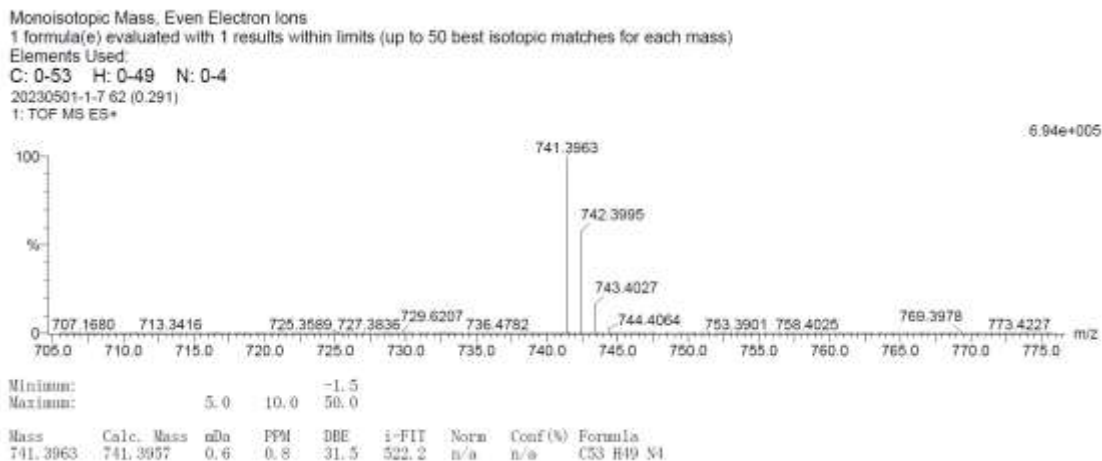

**Figure S3.** HR-MS (ESI) of compound **3**.

The preparation of powder samples were similar to that of co-crystal samples, but the difference was that the solvent was evaporated quickly, dried under vacuum at room temperature, and then ground with a mortar to obtain samples suitable for powder X-ray diffraction (PXRD).

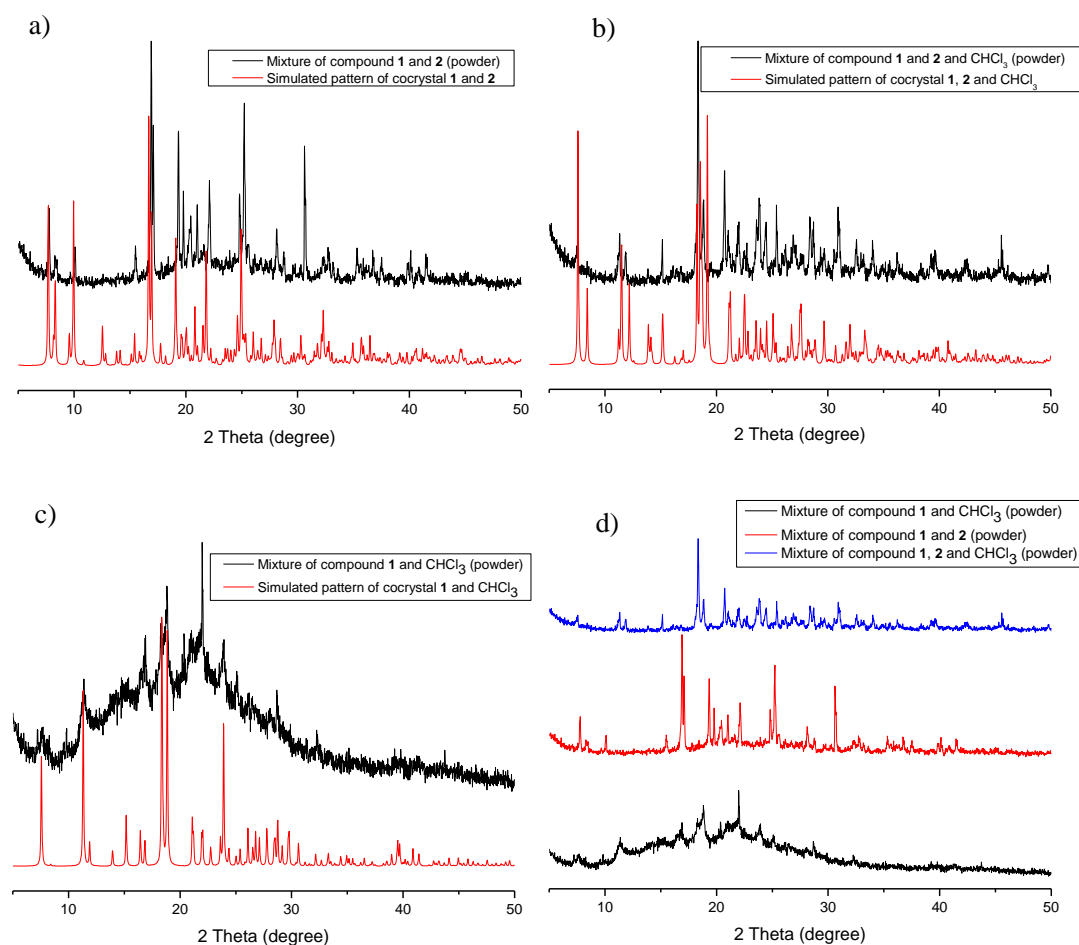

**Figure S4.** PXRD patterns of powder samples and simulated PXRD pattern of the cocrystal samples. (a) Comparison of the mixture of compound **1** and **2** (powder, red line) and simulated pattern of the co-crystal of **1**·**2** (black line). (b) Comparison of the

mixture of compound **1**, compound **2** and  $\text{CHCl}_3$  (powder, red line) and simulated pattern of the co-crystal of **solvate 1·2·CHCl<sub>3</sub>** (black line). (c) Comparison of the mixture of compound **1** and  $\text{CHCl}_3$  (powder, red line) and simulated pattern of the co-crystal of **solvate 1·CHCl<sub>3</sub>** (black line). (d) Comparison of the mixture of compound **1** and  $\text{CHCl}_3$  (powder, black line), mixture of compound **1** and compound **2** (powder, red line), mixture of compound **1**, compound **2** and  $\text{CHCl}_3$  (powder, blue line). (The equivalence ratio of compound **2** to **1** is 2:1.)

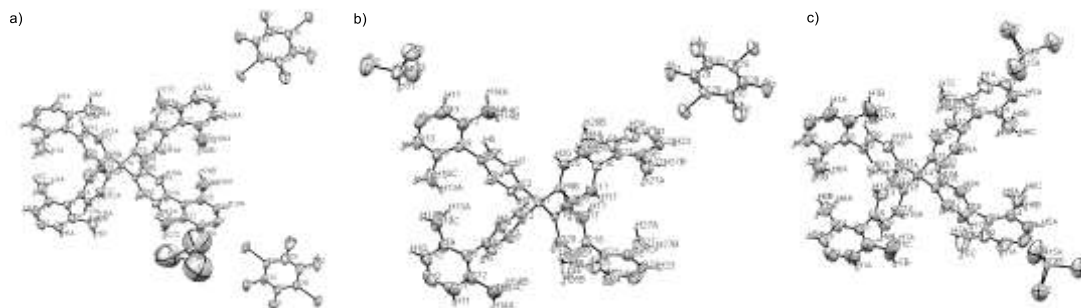

**Figure S5.** The co-crystal structure of a) **1·2**; b) **solvate 1·2·CHCl<sub>3</sub>**; c) **solvate 1·CHCl<sub>3</sub>** (all atoms were labeled).

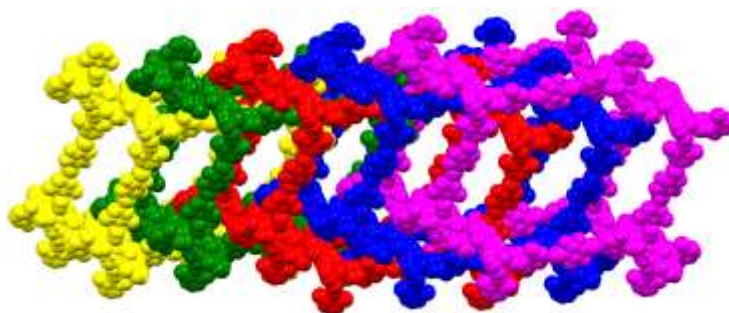

**Figure S6.** The five-interpenetrated networks of co-crystal **solvate 1·2·CHCl<sub>3</sub>** (For clarity, hydrogen atoms and molecules of chloroform were omitted from the interpenetrating structure).

The 3D network structure of co-crystal **solvate 1·2·CHCl<sub>3</sub>** exhibited five-interpenetrated networks (Figure S5). From the crystal structure, it can be seen that the red grid unit in the middle was associated with four other grid units on the left and right sides, resulting in a five-interpenetrated structure.

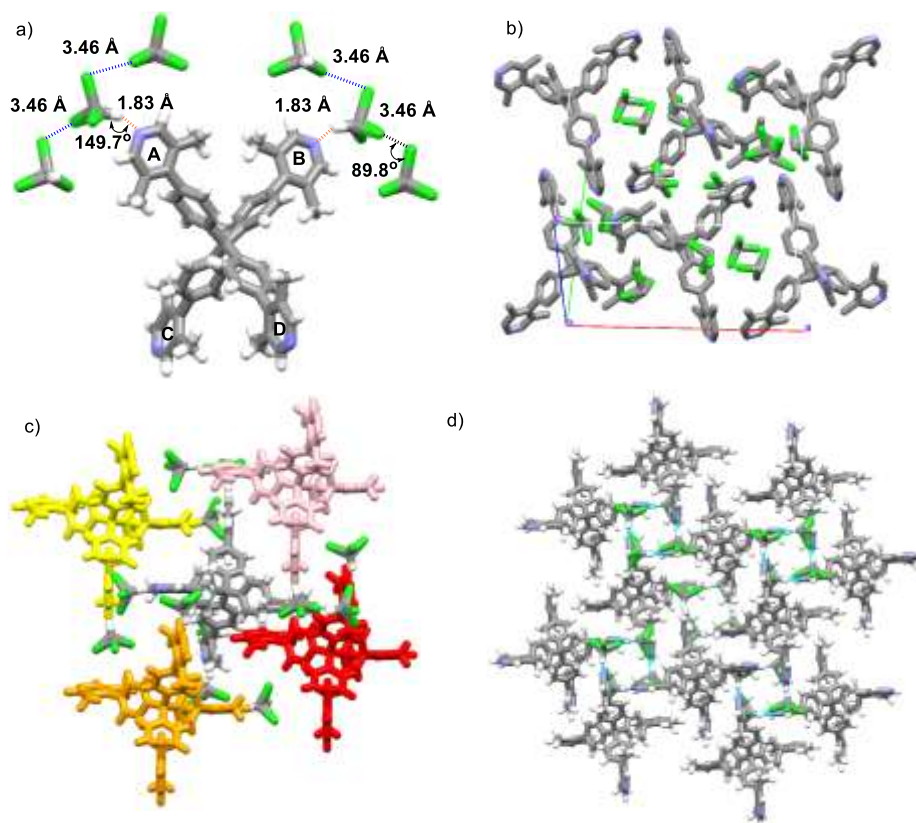

**Figure S7.** a) The co-crystal structure of **solvate 1·CHCl<sub>3</sub>**. (For clarity, molecules of chloroform associated with pyridine rings C and D were not shown). b) The intermolecular packing mode of compound **1** (For clarity, the hydrogen atoms in compound **1** were omitted). c) The five-monomer array. d) The 3D supramolecular XBOF.

When compound **1** was crystal cultured in chloroform without compound **2**, as expected, the co-crystal suitable for X-ray diffraction of compounds **solvate 1·CHCl<sub>3</sub>** was obtained. The asymmetric unit has one quarter of compound **1** with C14 centre and one molecule of CHCl<sub>3</sub> in a general position and linked to compound **1** by a well-defined C15-H15···N1 hydrogen bond. And the co-crystal structure revealed that The N atoms in the four terminal pyridine groups of compound **1** were respectively hydrogen-bonded (H···N distance: 1.83 Å, C-H···N bond angle: 149.7°) to a chloroform molecules. Each molecule of chloroform further bonded two other molecules of chloroform through Cl···Cl (Cl···Cl distance: 3.459(5) Å, C-Cl···Cl bond angle: 89.8(5)°) halogen bonding (Figure S7a, 7b). Detailed halogen and hydrogen bond lengths and angles for co-crystal of solvate **1·CHCl<sub>3</sub>** were given in Table S4-S5. The three nearest molecules of chloroform were hydrogen-bonded with pyridine terminals, which belong to three independent monomers, to form a five-monomer array shown in Figure S7c. In this five-monomer array, one tetraphenylmethane tetrapyridine molecule associated with other four molecules simultaneously through H···N hydrogen bonding and Cl···Cl halogen bonding, and the other four molecules further binded to other molecules. Finally, a 3D supramolecular XBOF was obtained (Figure S7d).

Table S1 Halogen bonds for co-crystal of **1·2** [Å and °]

| D-I...A           | d(D-I)   | d(I...A) | d(D...A) | <(DIA)   |
|-------------------|----------|----------|----------|----------|
| C(30)-I(1)...N(1) | 2.100(8) | 2.849(6) | 4.95(1)  | 178.4(2) |
| C(33)-I(2)...N(2) | 2.092(7) | 2.859(7) | 4.93(1)  | 170.5(2) |

Table S2 Hydrogen bonds for co-crystal of **solvate 1·2·CHCl<sub>3</sub>** [Å and °]

| D-H...A            | d(D-H) | d(H...A) | d(D...A) | <(DHA) |
|--------------------|--------|----------|----------|--------|
| C(31)-H(31)...N(2) | 0.98   | 2.33     | 3.24(3)  | 153    |

Table S3 Halogen bonds for co-crystal of **solvate 1·2·CHCl<sub>3</sub>** [Å and °]

| D-I...A           | d(D-I)  | d(I...A) | d(D...A) | <(DIA)   |
|-------------------|---------|----------|----------|----------|
| C(29)-I(1)...N(1) | 2.09(1) | 2.83(1)  | 4.92(2)  | 176.5(5) |

Table S4 Hydrogen bonds for co-crystal of **solvate 1·CHCl<sub>3</sub>** [Å and °]

| D-H...A             | d(D-H) | d(H...A) | d(D...A) | <(DHA) |
|---------------------|--------|----------|----------|--------|
| C(15)-H(15A)...N(1) | 0.979  | 1.829    | 2.72(1)  | 149.7  |

Table S5 Halogen bonds for co-crystal of **solvate 1·CHCl<sub>3</sub>** [Å and °]

| D-Cl...A             | d(D-Cl) | d(Cl...A) | d(D...A) | <(DCIA) |
|----------------------|---------|-----------|----------|---------|
| C(15')-Cl(3)...Cl(1) | 1.85(1) | 3.459(5)  | 3.91(1)  | 89.8(5) |

Table S6 Crystal data and structure refinement of co-crystal of **1·2**, co-crystal of **solvate 1·2·CHCl<sub>3</sub>** and co-crystal of **solvate 1·CHCl<sub>3</sub>**.

|                                           | co-crystal of<br><b>1·2</b>                                                                  | co-crystal of<br><b>solvate 1·2·CHCl<sub>3</sub></b>                                         | co-crystal of<br><b>solvate 1·CHCl<sub>3</sub></b>              |
|-------------------------------------------|----------------------------------------------------------------------------------------------|----------------------------------------------------------------------------------------------|-----------------------------------------------------------------|
| Formula                                   | C <sub>66</sub> H <sub>48</sub> Cl <sub>3</sub> F <sub>8</sub> I <sub>4</sub> N <sub>4</sub> | C <sub>61</sub> H <sub>50</sub> Cl <sub>6</sub> F <sub>4</sub> I <sub>2</sub> N <sub>4</sub> | C <sub>57</sub> H <sub>52</sub> Cl <sub>12</sub> N <sub>4</sub> |
| Mr.                                       | 1663.03                                                                                      | 1381.55                                                                                      | 1218.43                                                         |
| Cryst. system                             | Monoclinic                                                                                   | Monoclinic                                                                                   | Tetragonal                                                      |
| <i>T</i> (K)                              | 296                                                                                          | 297                                                                                          | 296                                                             |
| Space group                               | C2/c                                                                                         | C2/c                                                                                         | I4(1)/a                                                         |
| <i>a</i> /Å                               | 13.123(4)                                                                                    | 29.043(3)                                                                                    | 21.037(5)                                                       |
| <i>b</i> /Å                               | 43.843(14)                                                                                   | 14.0514(12)                                                                                  | 21.037(5)                                                       |
| <i>c</i> /Å                               | 13.393(4)                                                                                    | 20.8239(17)                                                                                  | 14.026(4)                                                       |
| <i>α</i> /Å                               | 90                                                                                           | 90                                                                                           | 90                                                              |
| <i>β</i> /Å                               | 114.914(5)                                                                                   | 133.661(2)                                                                                   | 90                                                              |
| <i>γ</i> /Å                               | 90                                                                                           | 90                                                                                           | 90                                                              |
| <i>V</i> (Å <sup>3</sup> )                | 6989(4)                                                                                      | 6147.9(10)                                                                                   | 6207(3)                                                         |
| <i>Z</i>                                  | 4                                                                                            | 4                                                                                            | 4                                                               |
| <i>D<sub>x</sub></i> (g/cm <sup>3</sup> ) | 1.581                                                                                        | 1.493                                                                                        | 1.304                                                           |
| <i>μ</i> (mm <sup>-1</sup> )              | 1.959                                                                                        | 1.337                                                                                        | 0.574                                                           |
| <i>F</i> (000)                            | 3228.0                                                                                       | 2752.0                                                                                       | 2504.0                                                          |
| R (reflections)                           | 0.0442 (4773)                                                                                | 0.1065 (3854)                                                                                | 0.1350 (1707)                                                   |
| wR2 (reflections)                         | 0.1422 (6077)                                                                                | 0.2587 (5405)                                                                                | 0.2750 (2658)                                                   |

## Co-crystal of 1.2

### checkCIF/PLATON report

You have not supplied any structure factors. As a result the full set of tests cannot be run.

THIS REPORT IS FOR GUIDANCE ONLY. IF USED AS PART OF A REVIEW PROCEDURE FOR PUBLICATION, IT SHOULD NOT REPLACE THE EXPERTISE OF AN EXPERIENCED CRYSTALLOGRAPHIC REFEREE.

No syntax errors found. CIF dictionary Interpreting this report

### Datablock: a

---

|                    |                                            |                                 |                         |
|--------------------|--------------------------------------------|---------------------------------|-------------------------|
| Bond precision:    | C-C = 0.0087 Å                             | Wavelength=0.71073              |                         |
| Cell:              | a=13.123(4)<br>alpha=90                    | b=43.843(14)<br>beta=114.914(5) | c=13.393(4)<br>gamma=90 |
| Temperature:       | 296 K                                      |                                 |                         |
|                    | Calculated                                 | Reported                        |                         |
| Volume             | 6989(4)                                    | 6989(4)                         |                         |
| Space group        | C 2/c                                      | C2/c                            |                         |
| Hall group         | -C 2yc                                     | ?                               |                         |
| Moiety formula     | C53 H48 N4, 2(C6 F4 I2), C<br>C13          | ?                               |                         |
| Sum formula        | C66 H48 Cl3 F8 I4 N4                       | C66 H48 Cl3 F8 I4 N4            |                         |
| Mr                 | 1663.03                                    | 1663.03                         |                         |
| Dx, g cm-3         | 1.581                                      | 1.581                           |                         |
| Z                  | 4                                          | 4                               |                         |
| Mu (mm-1)          | 1.959                                      | 1.959                           |                         |
| F000               | 3228.0                                     | 3228.0                          |                         |
| F000'              | 3223.55                                    |                                 |                         |
| h, k, lmax         | 15, 52, 15                                 | 15, 52, 15                      |                         |
| Nref               | 6159                                       | 6077                            |                         |
| Tmin, Tmax         | 0.572, 0.663                               | 0.600, 0.684                    |                         |
| Tmin'              | 0.561                                      |                                 |                         |
| Correction method= | # Reported T Limits: Tmin=0.600 Tmax=0.684 |                                 |                         |
| AbsCorr =          | MULTI-SCAN                                 |                                 |                         |
| Data completeness= | 0.987                                      | Theta(max)=                     | 25.000                  |
| R(reflections)=    | 0.0442( 4773)                              | wR2(reflections)=               | 0.1422( 6077)           |
| S =                | 1.058                                      | Npar=                           | 393                     |

## Co-crystal of 1.2

The following ALERTS were generated. Each ALERT has the format  
**test-name\_ALERT\_alert-type\_alert-level.**  
Click on the hyperlinks for more details of the test.

### Alert level C

|                   |            |           |                                      |                         |         |        |
|-------------------|------------|-----------|--------------------------------------|-------------------------|---------|--------|
| PLAT220_ALERT_2_C | NonSolvent | Read 1    | C                                    | Ueq(max)/Ueq(min) Range | 3.5     | Ratio  |
| PLAT241_ALERT_2_C | High       | 'MainMol' | Ueq as Compared to Neighbors of      |                         | C1      | Check  |
| PLAT241_ALERT_2_C | High       | 'MainMol' | Ueq as Compared to Neighbors of      |                         | C9      | Check  |
| PLAT241_ALERT_2_C | High       | 'MainMol' | Ueq as Compared to Neighbors of      |                         | C17     | Check  |
| PLAT242_ALERT_2_C | Low        | 'MainMol' | Ueq as Compared to Neighbors of      |                         | C2      | Check  |
| PLAT242_ALERT_2_C | Low        | 'MainMol' | Ueq as Compared to Neighbors of      |                         | C15     | Check  |
| PLAT250_ALERT_2_C | Large      | U3/U1     | Ratio for Average U(i,j) Tensor      | ....                    | 3.8     | Note   |
| PLAT260_ALERT_2_C | Large      | Average   | Ueq of Residue Including             | C11                     | 0.295   | Check  |
| PLAT342_ALERT_3_C | Low        | Bond      | Precision on C-C Bonds               | .....                   | 0.00871 | Ang.   |
| PLAT601_ALERT_2_C | Unit       | Cell      | Contains Solvent Accessible VOIDS of | .                       | 89      | Ang**3 |

### Alert level G

|                   |                             |                        |                             |                      |        |             |
|-------------------|-----------------------------|------------------------|-----------------------------|----------------------|--------|-------------|
| PLAT003_ALERT_2_G | Number of Uiso or Uij       | Restrained non-H Atoms | ...                         |                      | 3      | Report      |
| PLAT005_ALERT_3_G | No Embedded                 | Refinement Details     | Found in the CIF            |                      | Please | Do !        |
| PLAT083_ALERT_2_G | SHELXL                      | Second                 | Parameter in Wght           | Unusually            | Large  | 15.90 Why ? |
| PLAT300_ALERT_4_G | Atom Site                   | Occupancy of C11       | Constrained at              |                      | 0.5    | Check       |
| PLAT300_ALERT_4_G | Atom Site                   | Occupancy of C34       | Constrained at              |                      | 0.5    | Check       |
| PLAT302_ALERT_4_G | Anion/Solvent/Minor-Residue | Disorder (Read 3 1     |                             |                      | 50%    | Note        |
| PLAT380_ALERT_4_G | Incorrectly?                | Oriented X(sp2)-Methyl | Molety                      | ....                 | C7     | Check       |
| PLAT380_ALERT_4_G | Incorrectly?                | Oriented X(sp2)-Methyl | Molety                      | ....                 | C6     | Check       |
| PLAT431_ALERT_2_G | Short                       | Inter HL..A            | Contact I1                  | ..N1                 | 2.85   | Ang.        |
|                   |                             |                        |                             | 1+x,-1+y,z =         | 1.645  | Check       |
| PLAT431_ALERT_2_G | Short                       | Inter HL..A            | Contact I2                  | ..N2                 | 2.86   | Ang.        |
|                   |                             |                        |                             | 3/2-x,-1/2+y,3/2-z = | 4.646  | Check       |
| PLAT764_ALERT_4_G | Overcomplete                | CIF                    | Bond List                   | Detected (Rep/Expd)  | .      | 1.16 Ratio  |
| PLAT779_ALERT_4_G | Suspect or Irrelevant       | (Bond) Angle(s)        | in CIF                      | ...                  | 39.30  | Deg.        |
|                   | C34 -CL1 -C34               | 1.555                  | 1.555                       | 2.656                | .....  | # 128 Check |
| PLAT779_ALERT_4_G | Suspect or Irrelevant       | (Bond) Angle(s)        | in CIF                      | ...                  | 38.00  | Deg.        |
|                   | C34 -CL1 -CL2               | 1.555                  | 1.555                       | 2.656                | .....  | # 130 Check |
| PLAT779_ALERT_4_G | Suspect or Irrelevant       | (Bond) Angle(s)        | in CIF                      | ...                  | 40.40  | Deg.        |
|                   | C34 -CL1 -CL2               | 2.656                  | 1.555                       | 2.656                | .....  | # 132 Check |
| PLAT779_ALERT_4_G | Suspect or Irrelevant       | (Bond) Angle(s)        | in CIF                      | ...                  | 42.70  | Deg.        |
|                   | C34 -CL2 -CL1               | 2.656                  | 1.555                       | 2.656                | .....  | # 134 Check |
| PLAT779_ALERT_4_G | Suspect or Irrelevant       | (Bond) Angle(s)        | in CIF                      | ...                  | 37.60  | Deg.        |
|                   | C34 -CL2 -CL2               | 2.656                  | 1.555                       | 2.656                | .....  | # 136 Check |
| PLAT779_ALERT_4_G | Suspect or Irrelevant       | (Bond) Angle(s)        | in CIF                      | ...                  | 35.00  | Deg.        |
|                   | C34 -CL2 -CL2               | 1.555                  | 1.555                       | 2.656                | .....  | # 137 Check |
| PLAT860_ALERT_3_G | Number of Least-Squares     | Restraints             | .....                       |                      | 18     | Note        |
| PLAT899_ALERT_4_G | SHELXL97                    | is                     | Deprecated and Succeeded by | SHELXL/              | 2018   | Note        |

0 ALERT level A = Most likely a serious problem - resolve or explain  
0 ALERT level B = A potentially serious problem, consider carefully  
10 ALERT level C = Check, Ensure it is not caused by an omission or oversight  
19 ALERT level G = General information/check it is not something unexpected

0 ALERT type 1 CIF construction/syntax error, inconsistent or missing data



## Co-crystal of 1.2

```
13 ALERT type 2 Indicator that the structure model may be wrong or deficient
 2 ALERT type 3 Indicator that the structure quality may be low
13 ALERT type 4 Improvement, methodology, query or suggestion
 1 ALERT type 5 Informative message, check
```

---

It is advisable to attempt to resolve as many as possible of the alerts in all categories. Often the minor alerts point to easily fixed oversights, errors and omissions in your CIF or refinement strategy, so attention to these fine details can be worthwhile. In order to resolve some of the more serious problems it may be necessary to carry out additional measurements or structure refinements. However, the purpose of your study may justify the reported deviations and the more serious of these should normally be commented upon in the discussion or experimental section of a paper or in the "special\_details" fields of the CIF. checkCIF was carefully designed to identify outliers and unusual parameters, but every test has its limitations and alerts that are not important in a particular case may appear. Conversely, the absence of alerts does not guarantee there are no aspects of the results needing attention. It is up to the individual to critically assess their own results and, if necessary, seek expert advice.

### **Publication of your CIF in IUCr journals**

A basic structural check has been run on your CIF. These basic checks will be run on all CIFs submitted for publication in IUCr journals (*Acta Crystallographica*, *Journal of Applied Crystallography*, *Journal of Synchrotron Radiation*); however, if you intend to submit to *Acta Crystallographica Section C* or *E* or *IUCrData*, you should make sure that [full publication checks](#) are run on the final version of your CIF prior to submission.

### **Publication of your CIF in other journals**

Please refer to the *Notes for Authors* of the relevant journal for any special instructions relating to CIF submission.

---

**PLATON version of 12/09/2022; check.def file version of 09/08/2022**

Co-crystal of 1·2

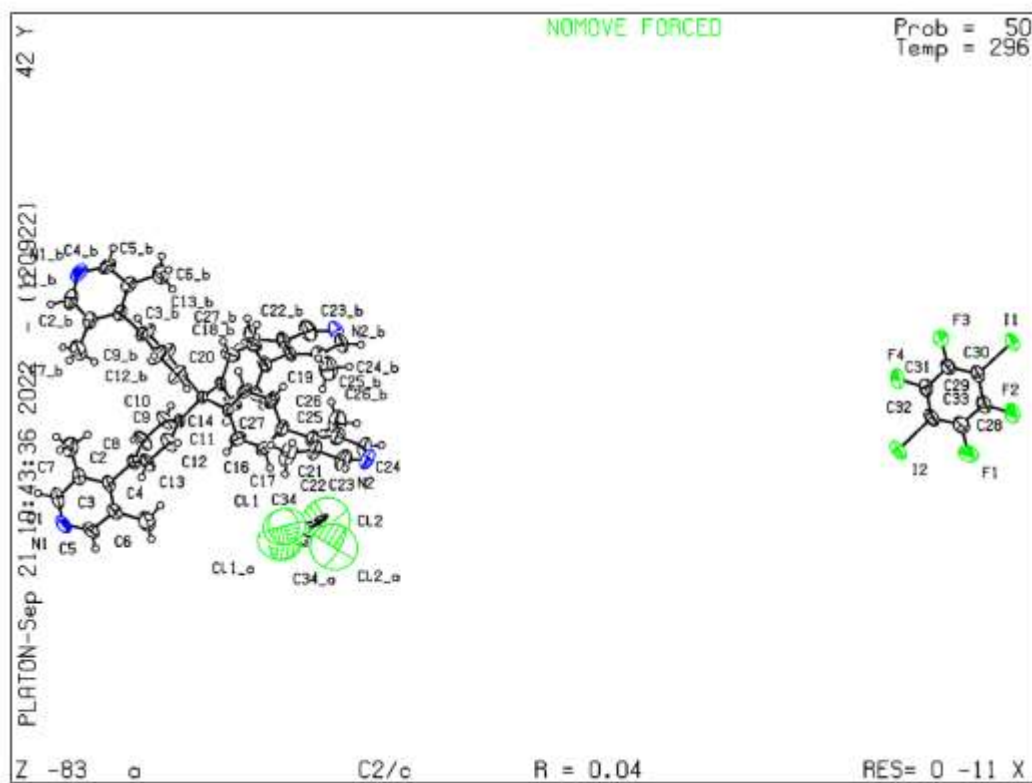

## Co-crystal solvate 1·2·CHCl<sub>3</sub>

### checkCIF/PLATON report

Structure factors have been supplied for datablock(s) 1

THIS REPORT IS FOR GUIDANCE ONLY. IF USED AS PART OF A REVIEW PROCEDURE FOR PUBLICATION, IT SHOULD NOT REPLACE THE EXPERTISE OF AN EXPERIENCED CRYSTALLOGRAPHIC REFEREE.

No syntax errors found. CIF dictionary Interpreting this report

### Datablock: 1

---

|                        |                                            |                                  |                           |
|------------------------|--------------------------------------------|----------------------------------|---------------------------|
| Bond precision:        | C-C = 0.0174 Å                             | Wavelength=0.71073               |                           |
| Cell:                  | a=29.043(3)<br>alpha=90                    | b=14.0514(12)<br>beta=133.661(2) | c=20.8239(17)<br>gamma=90 |
| Temperature:           | 297 K                                      |                                  |                           |
|                        | Calculated                                 | Reported                         |                           |
| Volume                 | 6147.9(10)                                 | 6147.9(9)                        |                           |
| Space group            | C 2/c                                      | C 1 2/c 1                        |                           |
| Hall group             | -C 2yc                                     | -C 2yc                           |                           |
| Moiety formula         | C53 H48 N4, C6 F4 I2, 2(C H C13)           | C6 F4 I2, 2(C H C13), C53 H48 N4 |                           |
| Sum formula            | C61 H50 Cl6 F4 I2 N4                       | C61 H50 Cl6 F4 I2 N4             |                           |
| Mr                     | 1381.55                                    | 1381.55                          |                           |
| Dx, g cm <sup>-3</sup> | 1.493                                      | 1.493                            |                           |
| Z                      | 4                                          | 4                                |                           |
| Mu (mm <sup>-1</sup> ) | 1.337                                      | 1.337                            |                           |
| F000                   | 2752.0                                     | 2752.0                           |                           |
| F000'                  | 2752.73                                    |                                  |                           |
| h, k, lmax             | 34, 16, 24                                 | 34, 16, 24                       |                           |
| Nref                   | 5418                                       | 5405                             |                           |
| Tmin, Tmax             | 0.773, 0.765                               | 0.458, 0.746                     |                           |
| Tmin'                  | 0.758                                      |                                  |                           |
| Correction method=     | # Reported T Limits: Tmin=0.458 Tmax=0.746 |                                  |                           |
| AbsCorr =              | NONE                                       |                                  |                           |
| Data completeness=     | 0.998                                      | Theta(max)=                      | 24.998                    |
| R(reflections)=        | 0.1065( 3854)                              | wR2(reflections)=                | 0.2587( 5405)             |
| S =                    | 1.110                                      | Npar=                            | 352                       |

## Co-crystal solvate 1·2·CHCl<sub>3</sub>

The following ALERTS were generated. Each ALERT has the format  
**test-name\_ALERT\_alert-type\_alert-level.**  
Click on the hyperlinks for more details of the test.

### Alert level B

RINTA01\_ALERT\_3\_B The value of Rint is greater than 0.18  
Rint given 0.187  
PLAT020\_ALERT\_3\_B The Value of Rint is Greater Than 0.12 ..... 0.187 Report

### Alert level C

PLAT042\_ALERT\_1\_C Calc. and Reported MoletyFormula Strings Differ Please Check  
PLAT082\_ALERT\_2\_C High R1 Value ..... 0.11 Report  
PLAT084\_ALERT\_3\_C High wR2 Value (i.e. > 0.25) ..... 0.26 Report  
PLAT220\_ALERT\_2\_C NonSolvent Resd I C Ueq(max)/Ueq(min) Range 6.0 Ratio  
PLAT222\_ALERT\_3\_C NonSolvent Resd I H Uiso(max)/Uiso(min) Range 4.1 Ratio  
PLAT234\_ALERT\_4\_C Large Hirshfeld Difference N1 --C23 0.16 Ang.  
PLAT234\_ALERT\_4\_C Large Hirshfeld Difference C9 --C13 0.20 Ang.  
PLAT242\_ALERT\_2\_C Low 'MainMol' Ueq as Compared to Neighbors of C15 Check  
PLAT242\_ALERT\_2\_C Low 'MainMol' Ueq as Compared to Neighbors of C25 Check  
PLAT242\_ALERT\_2\_C Low 'MainMol' Ueq as Compared to Neighbors of C30 Check  
PLAT244\_ALERT\_4\_C Low 'Solvent' Ueq as Compared to Neighbors of C31 Check  
PLAT250\_ALERT\_2\_C Large D3/U1 Ratio for Average U(i,j) Tensor .... 2.4 Note  
PLAT260\_ALERT\_2\_C Large Average Ueq of Residue Including C11 0.126 Check  
PLAT334\_ALERT\_2\_C Small <C-C> Benzene Dist. C2 -C7 1.37 Ang.  
PLAT334\_ALERT\_2\_C Small <C-C> Benzene Dist. C15 -C20 1.36 Ang.  
PLAT334\_ALERT\_2\_C Small <C-C> Benzene Dist. C28 -C30\_a 1.37 Ang.  
PLAT342\_ALERT\_3\_C Low Bond Precision on C-C Bonds ..... 0.01742 Ang.  
PLAT601\_ALERT\_2\_C Unit Cell Contains Solvent Accessible VOIDS of . 40 Ang\*\*3  
PLAT767\_ALERT\_4\_C INS Embedded LIST 6 Instruction Should be LIST 4 Please Check  
PLAT906\_ALERT\_3\_C Large K Value in the Analysis of Variance ..... 33.480 Check  
PLAT906\_ALERT\_3\_C Large K Value in the Analysis of Variance ..... 2.722 Check  
PLAT906\_ALERT\_3\_C Large K Value in the Analysis of Variance ..... 5.606 Check  
PLAT906\_ALERT\_3\_C Large K Value in the Analysis of Variance ..... 2.482 Check  
PLAT911\_ALERT\_3\_C Missing FCF Refl Between Thmin & STh/L= 0.595 10 Report  
PLAT913\_ALERT\_3\_C Missing # of Very Strong Reflections in FCF .... 5 Note

### Alert level G

PLAT083\_ALERT\_2\_G SHELXL Second Parameter in WGHT Unusually Large 121.61 Why ?  
PLAT128\_ALERT\_4\_G Alternate Setting for Input Space Group C2/c I2/4 Note  
PLAT380\_ALERT\_4\_G Incorrectly? Oriented X(sp2)-Methyl Molety ..... C27 Check  
PLAT431\_ALERT\_2\_G Short Inter HL..A Contact I1 ..N1 2.03 Ang.  
1-x,y,3/2-z = 2\_656 Check  
PLAT432\_ALERT\_2\_G Short Inter X...Y Contact I1 ..C24 3.46 Ang.  
1-x,y,3/2-z = 2\_656 Check  
PLAT909\_ALERT\_3\_G Percentage of I>2sig(I) Data at Theta(Max) Still 54% Note  
PLAT910\_ALERT\_3\_G Missing # of FCF Reflection(s) Below Theta(Min). 4 Note  
PLAT933\_ALERT\_2\_G Number of HKL-OMIT Records in Embedded .res File 3 Note  
PLAT961\_ALERT\_5\_G Dataset Contains no Negative Intensities ..... Please Check  
PLAT967\_ALERT\_5\_G Note: Two-Theta Cutoff Value in Embedded .res .. 50.0 Degree  
PLAT978\_ALERT\_2\_G Number C-C Bonds with Positive Residual Density. 3 Info

## Co-crystal solvate 1·2·CHCl<sub>3</sub>

```
0 ALERT level A - Most likely a serious problem - resolve or explain
2 ALERT level B - A potentially serious problem, consider carefully
25 ALERT level C - Check, Ensure it is not caused by an omission or oversight
11 ALERT level G - General information/check it is not something unexpected

1 ALERT type 1 CIF construction/syntax error, inconsistent or missing data
16 ALERT type 2 Indicator that the structure model may be wrong or deficient
13 ALERT type 3 Indicator that the structure quality may be low
6 ALERT type 4 Improvement, methodology, query or suggestion
2 ALERT type 5 Informative message, check
```

---

It is advisable to attempt to resolve as many as possible of the alerts in all categories. Often the minor alerts point to easily fixed oversights, errors and omissions in your CIF or refinement strategy, so attention to these fine details can be worthwhile. In order to resolve some of the more serious problems it may be necessary to carry out additional measurements or structure refinements. However, the purpose of your study may justify the reported deviations and the more serious of these should normally be commented upon in the discussion or experimental section of a paper or in the "special\_details" fields of the CIF. checkCIF was carefully designed to identify outliers and unusual parameters, but every test has its limitations and alerts that are not important in a particular case may appear. Conversely, the absence of alerts does not guarantee there are no aspects of the results needing attention. It is up to the individual to critically assess their own results and, if necessary, seek expert advice.

### Publication of your CIF in IUCr journals

A basic structural check has been run on your CIF. These basic checks will be run on all CIFs submitted for publication in IUCr journals (*Acta Crystallographica*, *Journal of Applied Crystallography*, *Journal of Synchrotron Radiation*); however, if you intend to submit to *Acta Crystallographica Section C* or *E* or *IUCrData*, you should make sure that [full publication checks](#) are run on the final version of your CIF prior to submission.

### Publication of your CIF in other journals

Please refer to the *Notes for Authors* of the relevant journal for any special instructions relating to CIF submission.

---

PLATON version of 28/11/2022; check.def file version of 28/11/2022

Co-crystal solvate 1·2·CHCl<sub>3</sub>

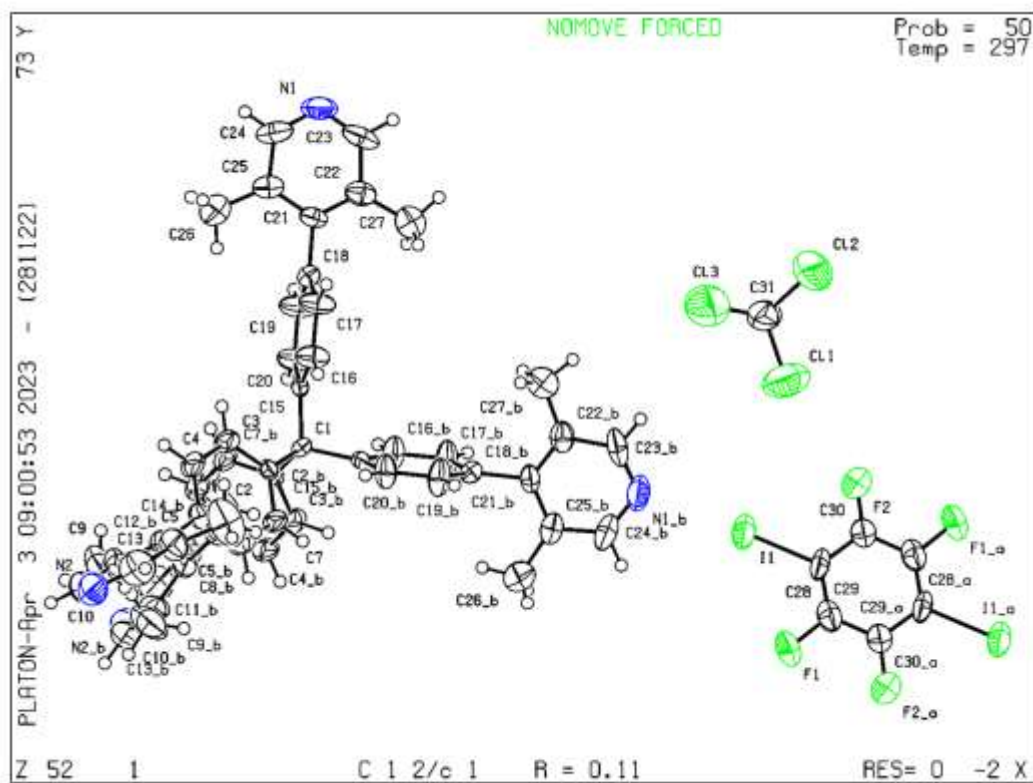



## Co-crystal solvate 1·CHCl<sub>3</sub>

The following ALERTS were generated. Each ALERT has the format  
**test-name\_ALERT\_alert-type\_alert-level.**  
Click on the hyperlinks for more details of the test.

### Alert level B

PLAT212\_ALERT\_2\_B ADP of Atom C15 is N.P.D. or (nearly) 2D . Please Check  
PLAT340\_ALERT\_3\_B Low Bond Precision on C-C Bonds ..... 0.01057 Ang.

### Alert level C

PLAT029\_ALERT\_3\_C \_diffn\_measured\_fraction\_theta\_full value Low . 0.970 Why?  
PLAT031\_ALERT\_4\_C Refined Extinction Parameter Within Range of ... 2.875 Sigma  
PLAT082\_ALERT\_2\_C High R1 Value ..... 0.14 Report  
PLAT084\_ALERT\_3\_C High wR2 Value (i.e. > 0.25) ..... 0.28 Report  
PLAT220\_ALERT\_2\_C NonSolvent Resd I C Ueq(max)/Ueq(min) Range 4.2 Ratio  
PLAT242\_ALERT\_2\_C Low 'MainMol' Ueq as Compared to Neighbors of C2 Check  
PLAT242\_ALERT\_2\_C Low 'MainMol' Ueq as Compared to Neighbors of C8 Check  
PLAT243\_ALERT\_4\_C High 'Solvent' Ueq as Compared to Neighbors of C11 Check  
PLAT243\_ALERT\_4\_C High 'Solvent' Ueq as Compared to Neighbors of C12 Check  
PLAT260\_ALERT\_2\_C Large Average Ueq of Residue Including C11 0.113 Check  
PLAT334\_ALERT\_2\_C Small <C-C> Benzene Dist. C8 -C13 . 1.37 Ang.  
PLAT336\_ALERT\_2\_C Long Bond Distance for ..... C15 -C11 1.881 Ang.  
PLAT790\_ALERT\_4\_C Centre of Gravity not Within Unit Cell: Resd. # 1 Note  
C53 H48 N4

### Alert level G

PLAT003\_ALERT\_2\_G Number of Uiso or Uij Restrained non-H Atoms ... 1 Report  
PLAT005\_ALERT\_5\_G No Embedded Refinement Details Found in the CIF Please Do !  
PLAT066\_ALERT\_1\_G Predicted and Reported Tmin&Tmax Range Identical ? Check  
PLAT083\_ALERT\_2\_G SHELXL Second Parameter in WGHT Unusually Large 72.00 Why ?  
PLAT300\_ALERT\_4\_G Atom Site Occupancy of C15 Constrained at 0.6 Check  
PLAT300\_ALERT\_4\_G Atom Site Occupancy of C15' Constrained at 0.4 Check  
PLAT302\_ALERT\_4\_G Anion/Solvent/Minor-Residue Disorder (Resd 2 ) 25% Note  
PLAT380\_ALERT\_4\_G Incorrectly? Oriented X(sp2)-Methyl Moiety ..... C7 Check  
PLAT432\_ALERT\_2\_G Short Inter X...Y Contact N1 ..C15 . 2.72 Ang.  
-1/2+x,y,3/2-z = 10\_557 Check  
PLAT764\_ALERT\_4\_G Overcomplete CIF Bond List Detected (Rep/Expd) . 1.19 Ratio  
PLAT779\_ALERT\_4\_G Suspect or Irrelevant (Bond) Angle(s) in CIF ... 12.20 Deg.  
C15' -C11 -C15 1\_555 1\_555 1\_555 ..... # 2 Check  
PLAT779\_ALERT\_4\_G Suspect or Irrelevant (Bond) Angle(s) in CIF ... 13.20 Deg.  
C15' -C12 -C15 1\_555 1\_555 1\_555 ..... # 3 Check  
PLAT779\_ALERT\_4\_G Suspect or Irrelevant (Bond) Angle(s) in CIF ... 7.70 Deg.  
C15' -C13 -C15 1\_555 1\_555 1\_555 ..... # 4 Check  
PLAT860\_ALERT\_3\_G Number of Least-Squares Restraints ..... 6 Note  
PLAT899\_ALERT\_4\_G SHELXL97 is Deprecated and Succeeded by SHELXL/ 2018 Note

0 ALERT level A = Most likely a serious problem - resolve or explain  
2 ALERT level B = A potentially serious problem, consider carefully  
13 ALERT level C = Check. Ensure it is not caused by an omission or oversight  
15 ALERT level G = General information/check it is not something unexpected

1 ALERT type 1 CIF construction/syntax error, inconsistent or missing data



## Co-crystal solvate 1·CHCl<sub>3</sub>

```
11 ALERT type 2 Indicator that the structure model may be wrong or deficient
 4 ALERT type 3 Indicator that the structure quality may be low
13 ALERT type 4 Improvement, methodology, query or suggestion
 1 ALERT type 5 Informative message, check
```

---

It is advisable to attempt to resolve as many as possible of the alerts in all categories. Often the minor alerts point to easily fixed oversights, errors and omissions in your CIF or refinement strategy, so attention to these fine details can be worthwhile. In order to resolve some of the more serious problems it may be necessary to carry out additional measurements or structure refinements. However, the purpose of your study may justify the reported deviations and the more serious of these should normally be commented upon in the discussion or experimental section of a paper or in the "special\_details" fields of the CIF. checkCIF was carefully designed to identify outliers and unusual parameters, but every test has its limitations and alerts that are not important in a particular case may appear. Conversely, the absence of alerts does not guarantee there are no aspects of the results needing attention. It is up to the individual to critically assess their own results and, if necessary, seek expert advice.

### Publication of your CIF in IUCr journals

A basic structural check has been run on your CIF. These basic checks will be run on all CIFs submitted for publication in IUCr journals (*Acta Crystallographica*, *Journal of Applied Crystallography*, *Journal of Synchrotron Radiation*); however, if you intend to submit to *Acta Crystallographica Section C* or *E* or *IUCrData*, you should make sure that [full publication checks](#) are run on the final version of your CIF prior to submission.

### Publication of your CIF in other journals

Please refer to the *Notes for Authors* of the relevant journal for any special instructions relating to CIF submission.

---

PLATON version of 18/05/2022; check.def file version of 17/05/2022

Co-crystal solvate 1·CHCl<sub>3</sub>

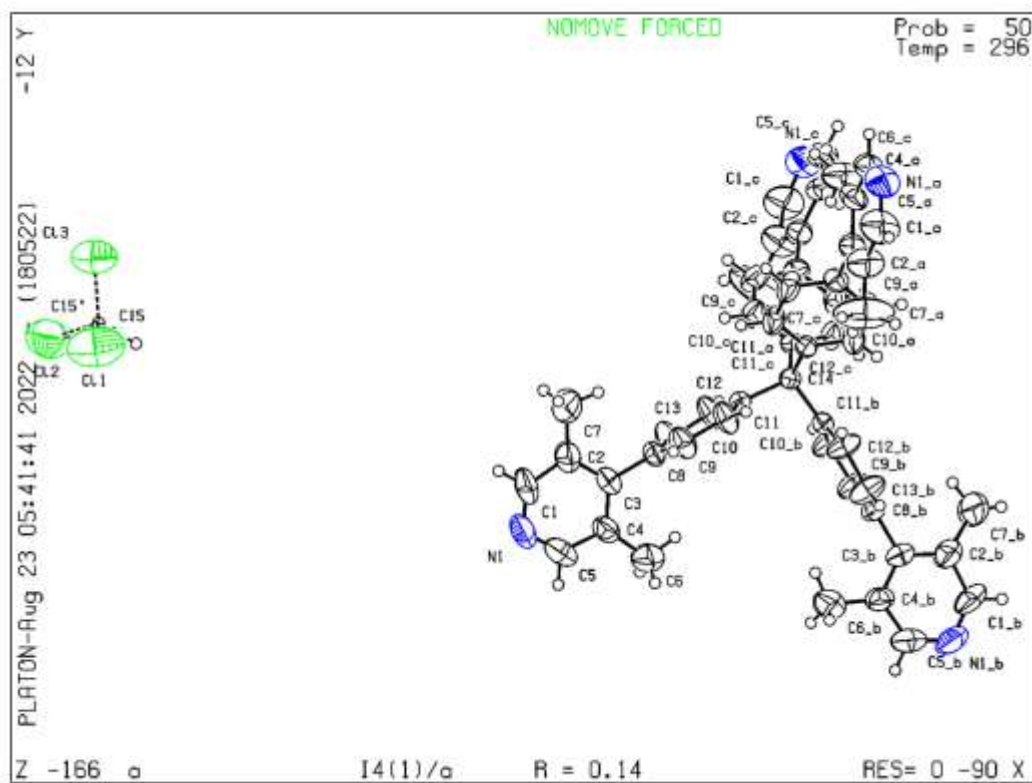

Supplement: d3cc02981f1.pdf [file d3cc02981f1.pdf]
